# Supplementary material for: Elucidating solid electrolyte interphase formation in sodium-based batteries: key reductive reactions and inorganic composition
Source: Royal Society of Chemistry journal article supplement (doi:10.1039/d3ta01878d), 2023-01-01
Supplement: d3ta01878d1.pdf [file d3ta01878d1.pdf]

**Force field optimization:** To provide a training set of QM data to train ReaxFF for NaClO<sub>4</sub>, we use the B3LYP hybrid flavour of the density functional method with the 6-311+G(d,p) basis set. All QM calculations were conducted using Jaguar 8.8. During the force field optimization procedure, the cost objective function was expressed as deviations between QM and ReaxFF energies and forces as in Eq. (1). Here,  $x_{(i,QM)}$  and  $x_{(i,ReaxFF)}$  are the corresponding values for the QM and ReaxFF results, respectively, and  $\sigma_i$  is the weight parameter adjusted based on the accuracy in the training data.

$$Error = \sum_{i=1}^n \left[ \frac{(x_{i,QM} - x_{i,ReaxFF})}{\sigma_i} \right]^2 \quad \text{Eq. (1)}$$

### The detailed formation mechanisms of major products

- **NaF formation:** NaF is formed by the defluorination reaction from FEC via Path 1, as shown in **Figure 2** and **Figure S7a-c**;
- **NaOH formation:** NaOH comes from the hydration of Na<sub>2</sub>O<sub>2</sub> and Na<sub>2</sub>O, especially when excessive Na<sup>0</sup> is present, as shown in **Figure 4** and **Figure S2**.
- **Na<sub>2</sub>CO<sub>3</sub> formation:** CO<sub>3</sub><sup>2-</sup> is formed by the reduction of PC and FEC via path 2 and path 3, as shown in **Figure 2**, **Figure 3** and **Figure S7d-f**;
- **Na<sub>2</sub>O and Na<sub>2</sub>O<sub>2</sub> formation:** The reduction of PC and FEC supplied a large amount of oxygen atoms, leading to the formation of Na<sub>2</sub>O<sub>2</sub> and Na<sub>2</sub>O, as shown in **Figure S7h**.
- **C<sub>3</sub>H<sub>6</sub> formation:** C<sub>3</sub>H<sub>6</sub> is from the reduction of PC to release CO<sub>3</sub><sup>2-</sup> via Path 3, as shown in **Figure 2** and **Figure S7j-l**;
- **NaCl and NaClO<sub>x</sub> formation:** ClO<sub>4</sub><sup>-</sup> anions sequentially reduce into ClO<sub>x</sub><sup>-</sup> (x=3,2,1) accompanied by O<sub>2</sub><sup>-</sup> release (**Figure S7g-h**), eventually forming Cl<sup>-</sup>;

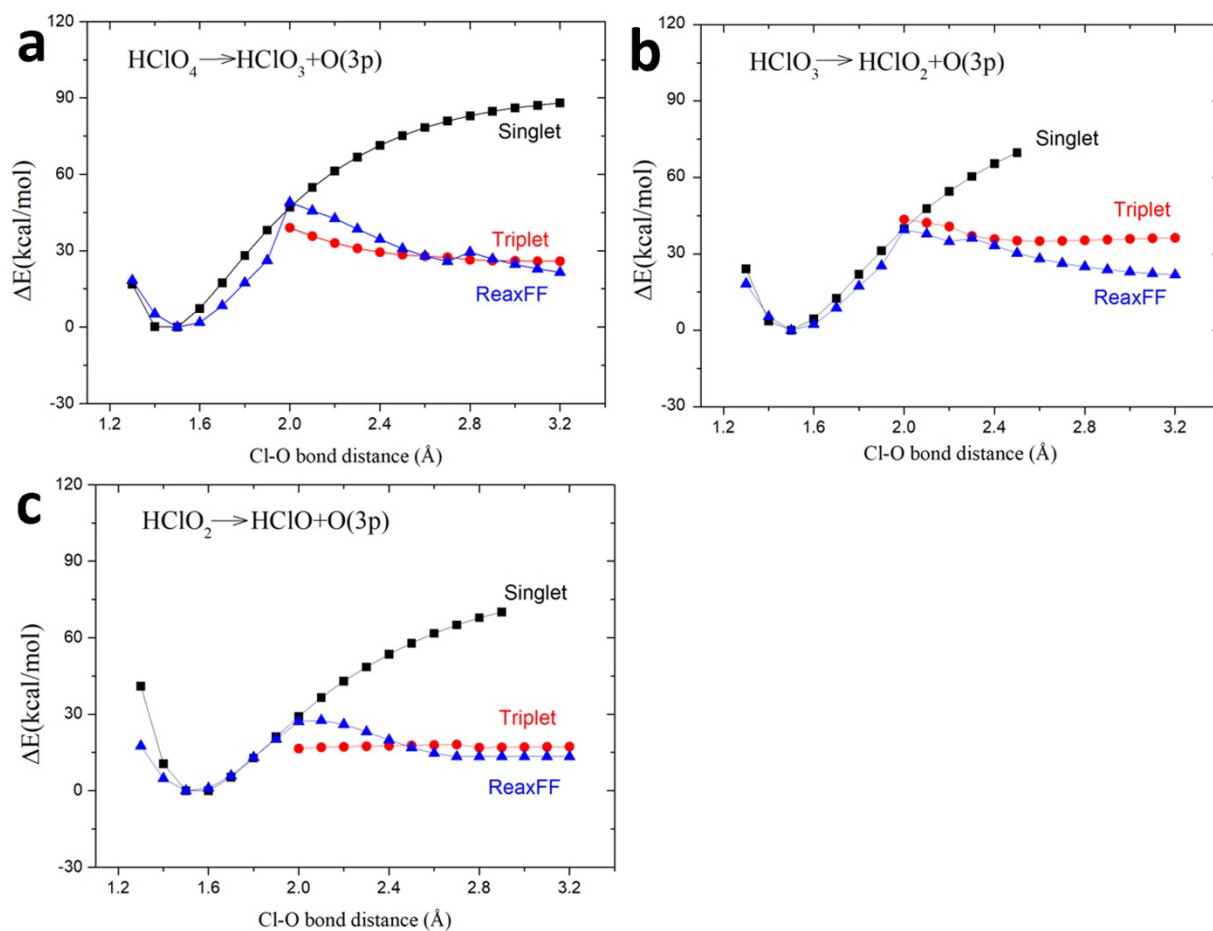

**Figure S1.** Cl-O bond dissociation curves for the QM and ReaxFF results. (a) The Cl-O bond dissociation curves for  $\text{HClO}_4$ . (b) The Cl-O bond dissociation curves for  $\text{HClO}_3$ . (c) The Cl-O bond dissociation curves for  $\text{HClO}_2$ .

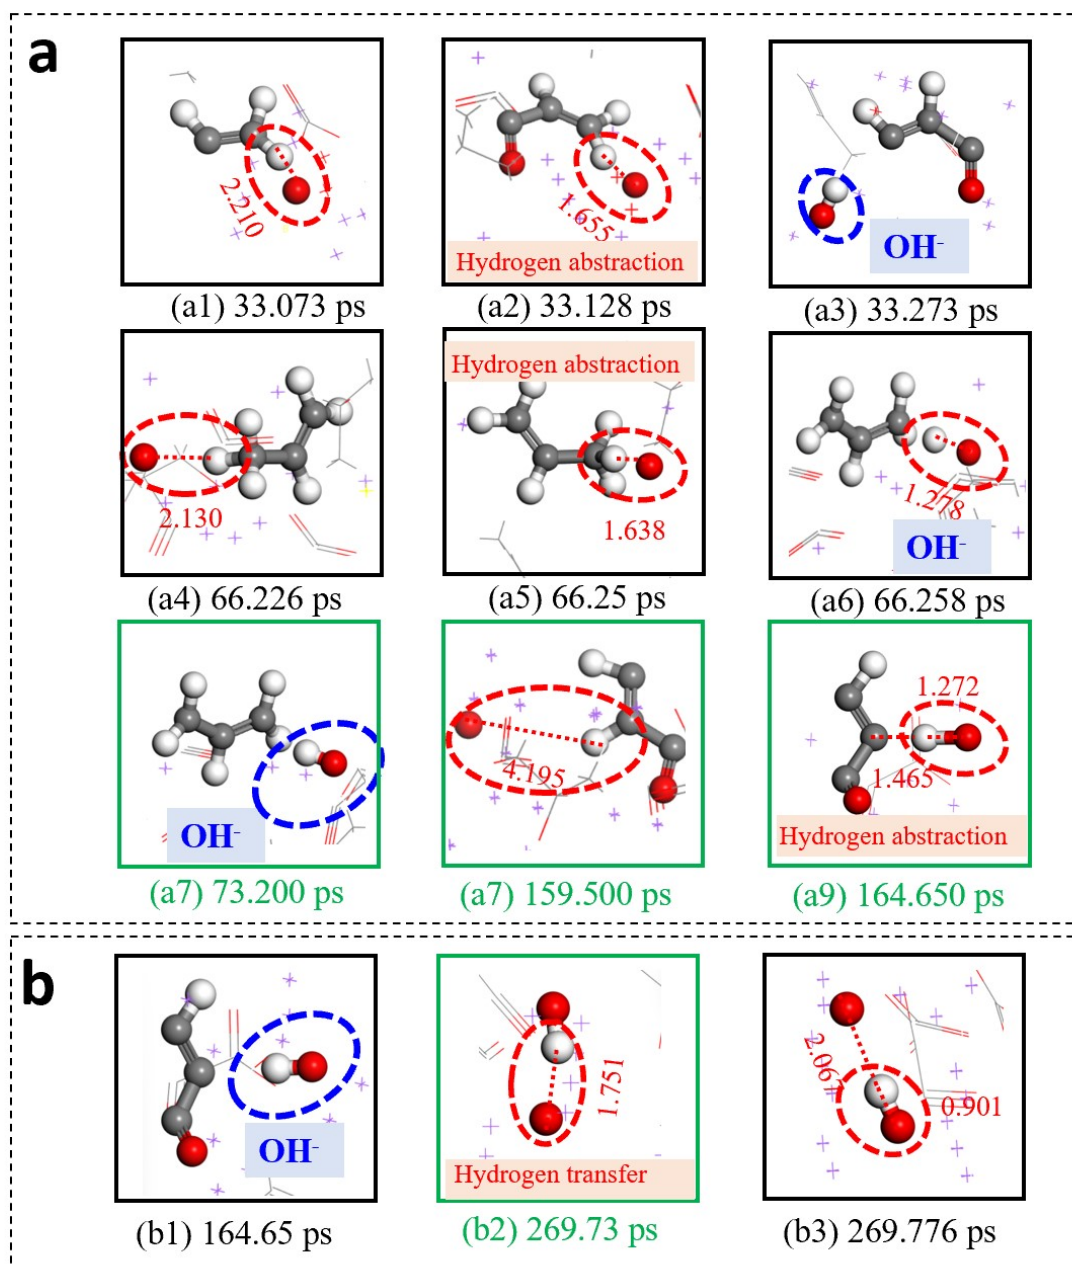

**Figure S2.** Sequence for  $\text{OH}^-$  formation obtained from HAIR simulations between 33.073 ps and 269.776 ps. (a)  $\text{OH}^-$  formation via a hydrogen abstraction process. (b)  $\text{OH}^-$  formation via a hydrogen transfer process between 6.0 ps and 11.5 ps. Color codes are the same as in Figure 1. Bond distances are in Å.

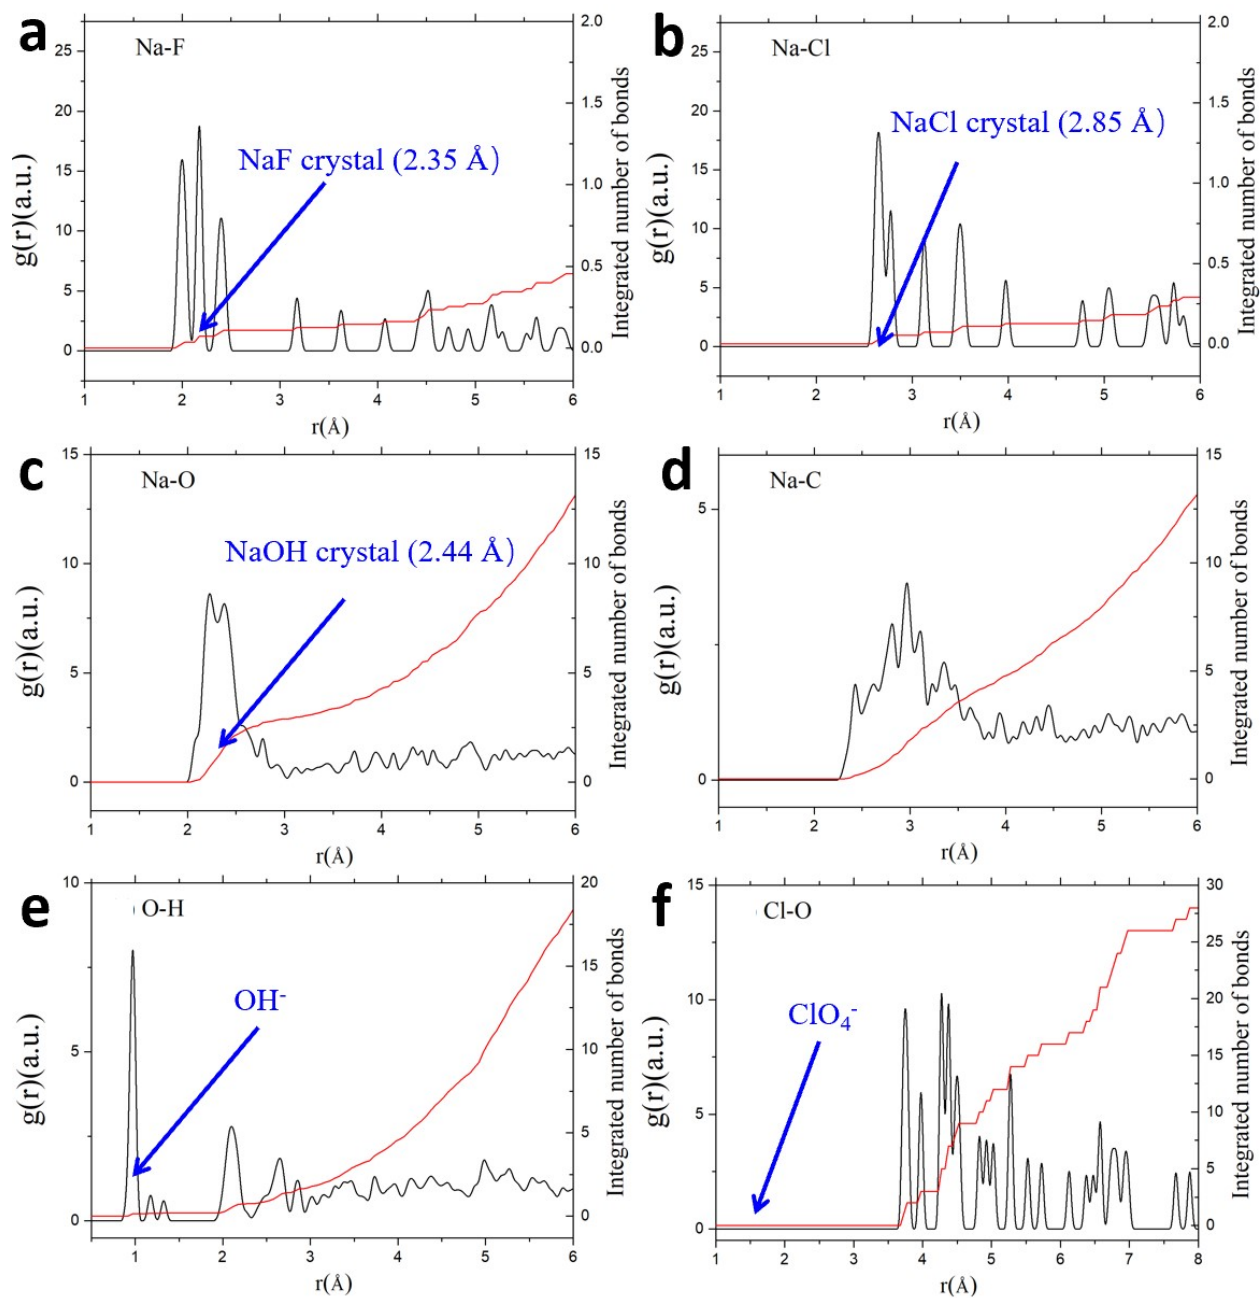

**Figure S3.** Radial distribution function and integrated number of bonds for (a) Na-F, (b) Na-Cl, (c) Na-O, (d) Na-C, (e) O-H and (f) Cl-O. Red lines and black lines represent the radial distribution function and integrated number of bonds, respectively.

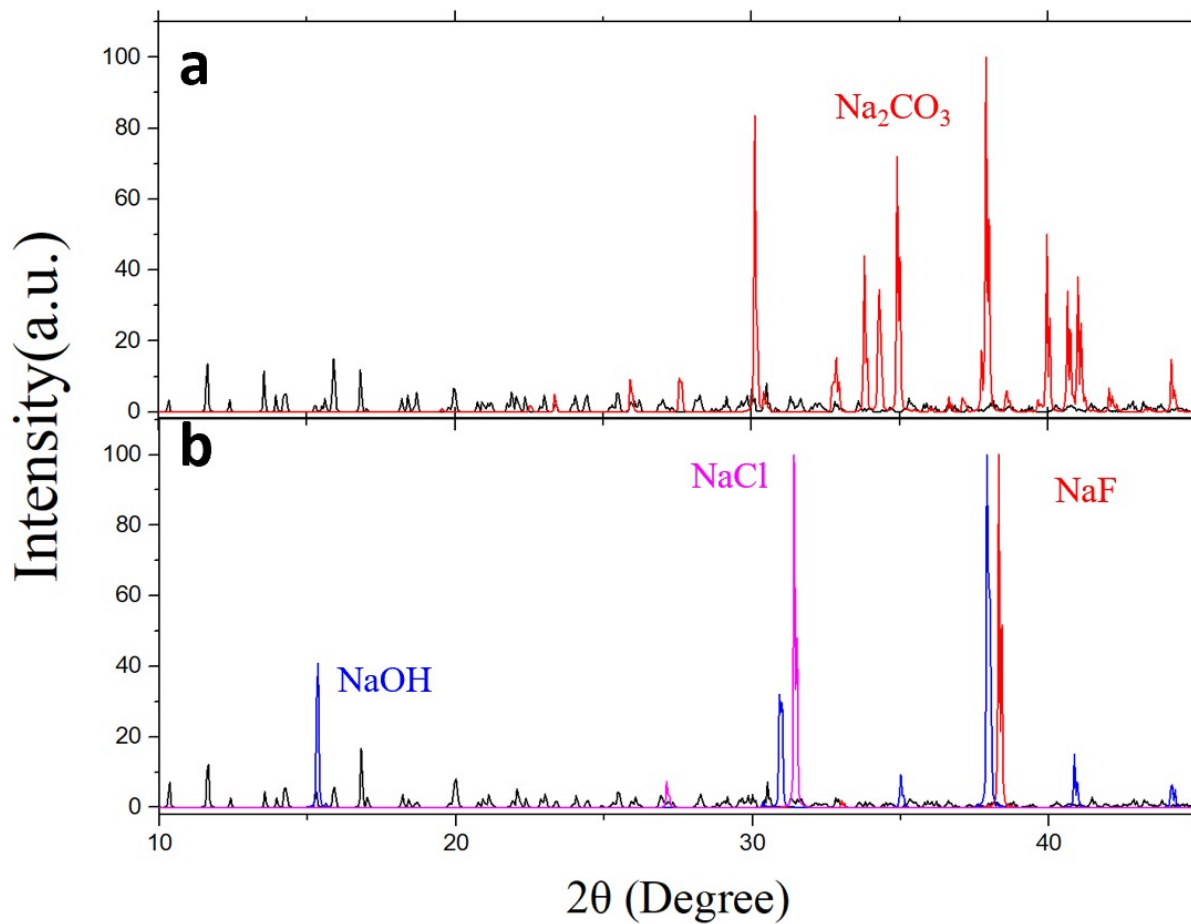

**Figure S4.** (a) XRD patterns from HAIR MD simulations at 275 ps. (b) XRD patterns from HAIR MD simulations at 2800 ps.

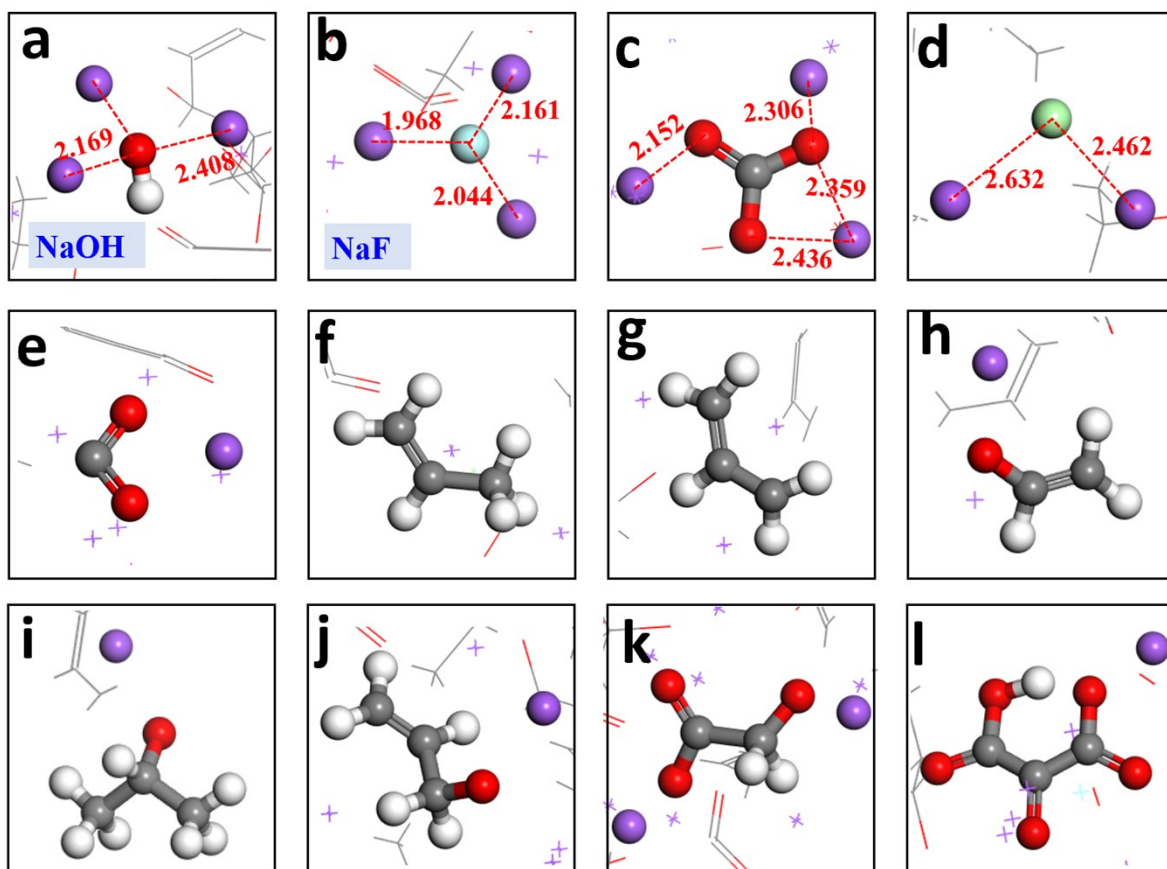

**Figure S5.** The possible products obtained from HAIR MD simulations. (a) NaOH. (b) NaF. (c)  $\text{Na}_2\text{CO}_3$ . (d) NaCl. (e)  $\text{CO}_2$ . (f)  $\text{C}_3\text{H}_6$ . (g)  $\text{C}_3\text{H}_5$ . (h)  $\text{NaOC}_2\text{H}_3$ . (i)  $\text{NaOC}_3\text{H}_7$ . (j)  $\text{NaOC}_3\text{H}_5$ . (k)  $\text{Na}_2\text{O}(\text{O})\text{CH}_2\text{O}$ . (l)  $\text{NOC}_3\text{O}_3\text{OH}$ .

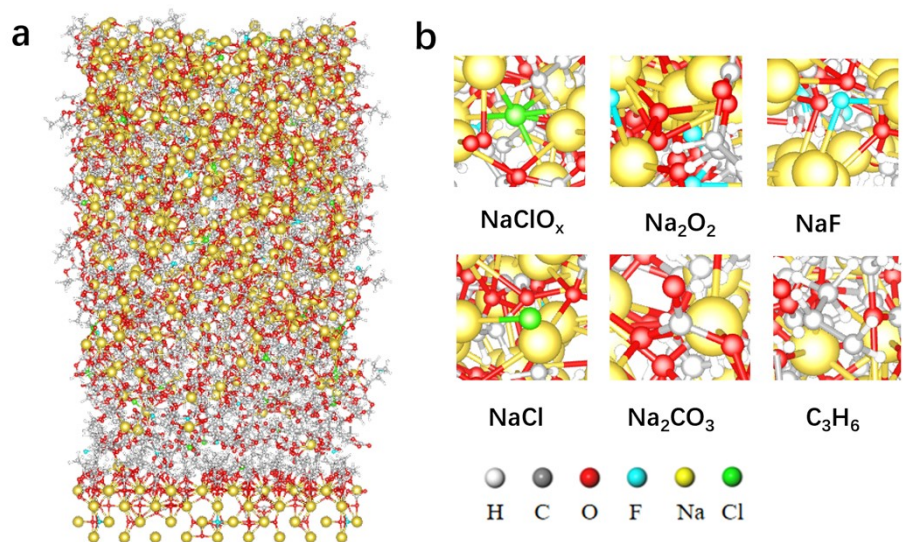

**Figure S6.** (a) The final snapshot and (b) the atomic structures of major products after 1 ns RMD simulation.

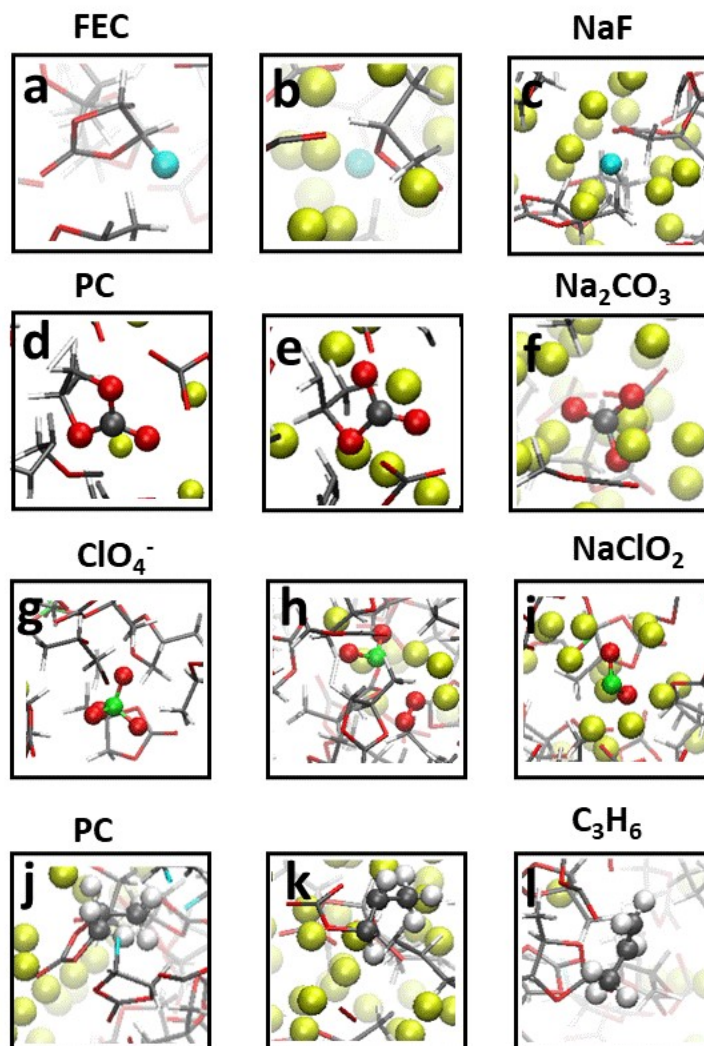

**Figure S7.** The formation processes of the species in ReaxFF MD simulations. (a-c) The formation of NaF from FEC. (d-f) The formation of Na<sub>2</sub>CO<sub>3</sub> from PC. (g-i) The formation of NaClO<sub>2</sub> from ClO<sub>4</sub><sup>-</sup>. (j-l) The formation of C<sub>3</sub>H<sub>6</sub> from PC.



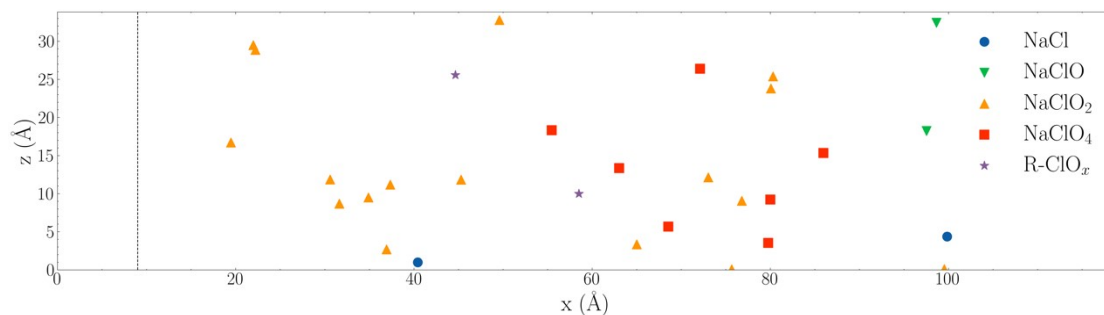

**Figure S8.** 2D (z-x) spatial distribution of Cl in different compounds (NaCl, NaClO, NaClO<sub>2</sub>, NaClO<sub>4</sub> and R-ClO<sub>x</sub>) projected along the y-direction from the 1 ns RMD simulation. The interface at 9 nm between the Na-anode and electrolyte is shown as a black dashed line.

**Table S1.** The geometries of the training set using the QM and ReaxFF methods.

| Molecule          | Bond/Angle                                       | QM<br>(B3LYP/6-311+G**) | ReaxFF |
|-------------------|--------------------------------------------------|-------------------------|--------|
| HClO <sub>4</sub> | Cl <sub>1</sub> -O <sub>2</sub>                  | 1.448                   | 1.512  |
|                   | Cl <sub>1</sub> -O <sub>3</sub>                  | 1.460                   | 1.512  |
|                   | O <sub>2</sub> - Cl <sub>1</sub> -O <sub>4</sub> | 115.2                   | 108.5  |
|                   | O <sub>2</sub> - Cl <sub>1</sub> -O <sub>5</sub> | 100.6                   | 110.4  |
|                   | O <sub>3</sub> - Cl <sub>1</sub> -O <sub>4</sub> | 113.6                   | 108.4  |
| HClO <sub>3</sub> | Cl <sub>1</sub> -O <sub>2</sub>                  | 1.483                   | 1.515  |
|                   | Cl <sub>1</sub> -O <sub>3</sub>                  | 1.483                   | 1.515  |
|                   | O <sub>2</sub> - Cl <sub>1</sub> -O <sub>4</sub> | 115.2                   | 117.7  |
|                   | O <sub>3</sub> - Cl <sub>1</sub> -O <sub>5</sub> | 115.2                   | 117.7  |
| HClO <sub>2</sub> | O <sub>2</sub> - Cl <sub>1</sub> -O <sub>3</sub> | 113.4                   | 116.4  |
|                   | Cl <sub>1</sub> -O <sub>2</sub>                  | 1.546                   | 1.508  |
|                   | O <sub>2</sub> - Cl <sub>1</sub> -O <sub>3</sub> | 113.7                   | 116.3  |

**Table S2.** The relative reaction energies (in kcal/mol) for QM and ReaxFF calculations.

| Reaction                                              | QM<br>(B3LYP/6-311+G**) | ReaxFF |
|-------------------------------------------------------|-------------------------|--------|
| $\text{HClO}_4 = \text{HClO}_3 + \text{O}(3\text{p})$ | 28.4                    | 36.6   |
| $\text{HClO}_3 = \text{HClO}_2 + \text{O}(3\text{p})$ | 39.5                    | 38.5   |
| $\text{HClO}_2 = \text{HClO} + \text{O}(3\text{p})$   | 20.9                    | 22.4   |

**Table S3.** Calculated binding energy and corresponding values in experiments.

| Species (Na 1 s, O 1 s, C1s) | Calculated Binding energy (eV) | Experimental Binding energy (eV) | Calculated Binding energy shift (eV) | Experimental Binding energy shift (eV) |
|------------------------------|--------------------------------|----------------------------------|--------------------------------------|----------------------------------------|
| <u>Na</u> -O                 | 1029.6                         | 1027.1                           | 0                                    | 0                                      |
| <u>Na</u> -F                 | 1030.4                         | 1027.7                           | 0.8                                  | 0.6                                    |
| C- <u>O</u> -Na              | 505.3                          | 531.8                            | 0                                    | 0                                      |
| Na <u>O</u> H                | 506.2                          | 532.8                            | 0.9                                  | 1                                      |
| C= <u>O</u>                  | 506.7                          | 532.9                            | 1.4                                  | 1.1                                    |
| <u>C</u> =C                  | 264.7                          | 284.3                            | -0.7                                 | -0.7                                   |
| <u>C</u> -C/ <u>C</u> -H     | 265.4                          | 285                              | 0                                    | 0                                      |
| <u>C</u> -O                  | 266.7                          | 286.3                            | 1.3                                  | 1.3                                    |
| <u>C</u> =O                  | 267.3                          | 287.8                            | 1.9                                  | 2.8                                    |
| O= <u>C</u> -O               | 268.6                          | 288.6                            | 3.2                                  | 3.6                                    |

Note: The binding energy shift values in Na 1 s, O 1 s and C 1 s are shifted to Na-O, C-O-Na and C-C/C-H, respectively.

**Table S4.** The number (N) of major products from 1 ns ReaxFF MD simulations of two independent simulations (Samples 1 and 2) starting from different initial configurations.

| <b>Mol.</b> | <b>Na<sub>2</sub>CO<sub>3</sub></b> | <b>C<sub>3</sub>H<sub>5</sub></b> | <b>CO<sub>2</sub></b> | <b>NaF</b> | <b>NaCl</b> | <b>NaOH</b> |
|-------------|-------------------------------------|-----------------------------------|-----------------------|------------|-------------|-------------|
| <b>No.</b>  | 1                                   | 4                                 | 5                     | 2          | 1           | 4           |

**Table S5.** The number (N) of major products from 1ns ReaxFF MD simulations.

| <b>Mol.</b> | <b>Na<sub>2</sub>O<sub>2</sub></b> | <b>Na<sub>2</sub>CO<sub>3</sub></b> | <b>C<sub>3</sub>H<sub>6</sub></b> | <b>Na<sub>2</sub>O</b> | <b>NaClO<sub>2</sub></b> | <b>NaF</b> | <b>NaCl</b> | <b>NaOH</b> |
|-------------|------------------------------------|-------------------------------------|-----------------------------------|------------------------|--------------------------|------------|-------------|-------------|
| <b>No.</b>  | 27                                 | 15                                  | 15                                | 17                     | 14                       | 9          | 4           | 0           |

**Table S5.** The number (N) of major products from 2.8 ns HAIR MD simulations.

| <b>Sample</b> | <b>Na<sub>2</sub>CO<sub>3</sub></b> | <b>C<sub>3</sub>H<sub>5</sub></b> | <b>CO<sub>2</sub></b> | <b>NaF</b> | <b>NaCl</b> | <b>NaOH</b> |
|---------------|-------------------------------------|-----------------------------------|-----------------------|------------|-------------|-------------|
| <b>1</b>      | 1                                   | 4                                 | 5                     | 2          | 2           | 4           |

**Table S6.** The number (N) of major Cl-containing products from 1 ns RMD simulations.

| <b>Mol.</b> | <b>NaCl</b> | <b>NaClO</b> | <b>NaClO<sub>2</sub></b> | <b>NaClO<sub>4</sub></b> | <b>R-ClO<sub>x</sub></b> |
|-------------|-------------|--------------|--------------------------|--------------------------|--------------------------|
| <b>No.</b>  | 2           | 2            | 17                       | 7                        | 2                        |



## Appendix: Force field parameters.

39 ! Number of general parameters

50.0000 !p\_boc1 Eq(4c): Overcoordination parameter

9.5469 !p\_boc2 Eq(4d): Overcoordination parameter

26.5405 !p\_coa2 Eq(15): Valency angle conjugation

1.7224 !p\_trip4 Eq(20): Triple bond stabilisation

6.8702 !p\_trip3 Eq(20): Triple bond stabilisation

60.4850 !k\_c2 Eq(19): C2-correction

1.0588 !p\_ovun6 Eq(12): Undercoordination

4.6000 !p\_trip2 Eq(20): Triple bond stabilisation

12.1176 !p\_ovun7 Eq(12): Undercoordination

13.3056 !p\_ovun8 Eq(12): Undercoordination

-70.5044 !p\_trip1 Eq(20): Triple bond stabilization

0.0000 !Lower Taper-radius (must be 0)

10.0000 !R\_cut Eq(21): Upper Taper-radius

2.8793 !p\_fe1 Eq(6a): Fe dimer correction

33.8667 !p\_val6 Eq(13c): Valency undercoordination

6.0891 !p\_lp1 Eq(8): Lone pair param

1.0563 !p\_val9 Eq(13f): Valency angle exponent

2.0384 !p\_val10 Eq(13g): Valency angle parameter

6.1431 !p\_fe2 Eq(6a): Fe dimer correction

6.9290 !p\_pen2 Eq(14a): Double bond/angle param

0.3989 !p\_pen3 Eq(14a): Double bond/angle param

3.9954 !p\_pen4 Eq(14a): Double bond/angle param

-2.4837 !p\_fe3 Eq(6a): Fe dimer correction

5.7796 !p\_tor2 Eq(16b): Torsion/BO parameter

10.0000 !p\_tor3 Eq(16c): Torsion overcoordination

1.9487 !p\_tor4 Eq(16c): Torsion overcoordination  
 -1.2327 !p\_elho Eq(26a): electron-hole interaction  
 2.1645 !p\_cot2 Eq(17b): Conjugation if tors13=0  
 1.5591 !p\_vdW1 Eq(23b): vdWaals shielding  
 0.1000 !Cutoff for bond order (\*100)  
 2.1365 !p\_coa4 Eq(15): Valency angle conjugation  
 0.6991 !p\_ovun4 Eq(11b): Over/Undercoordination  
 50.0000 !p\_ovun3 Eq(11b): Over/Undercoordination  
 1.8512 !p\_val8 Eq(13d): Valency/lone pair param  
 0.5000 !X\_soft Eq(25): ACKS2 softness for X\_ij  
 20.0000 !d Eq(23d): Scale factor in lg-dispersion  
 5.0000 !p\_val Eq(27): Gauss exponent for electrons  
 0.0000 !1 Eq(13e): disable undecoord in val angle  
 2.6962 !p\_coa3 Eq(15): Valency angle conjugation  
 11 ! Nr of atoms; cov.r; valency;a.m;Rvdw;Evdw;gammaEEM;cov.r2;#  
     alfa;gammavdW;valency;Eunder;Eover;chiEEM;etaEEM;n.u.  
     cov r3;Elp;Heat inc.;bo131;bo132;bo133;softcut;n.u.  
     ov/un;val1;n.u.;val3,vval4  
 C 1.3817 4.0000 12.0000 1.8903 0.1838 0.9000 1.1341 4.0000  
     9.7559 2.1346 4.0000 34.9350 79.5548 5.9666 7.0000 0.0000  
     1.2114 0.0000 202.5551 8.9539 34.9289 13.5366 0.8563 0.0000  
     -2.8983 2.5000 1.0564 4.0000 2.9663 0.0000 0.0000 0.0000  
 H 0.8930 1.0000 1.0080 1.3550 0.0930 0.8203 -0.1000 1.0000  
     8.2230 33.2894 1.0000 0.0000 121.1250 3.7248 9.6093 1.0000  
     -0.1000 0.0000 61.6606 3.0408 2.4197 0.0003 1.0698 0.0000  
     -19.4571 4.2733 1.0338 1.0000 2.8793 0.0000 0.0000 0.0000  
 O 1.2450 2.0000 15.9990 2.3890 0.1000 1.0898 1.0548 6.0000

|    |          |         |          |          |          |         |         |         |
|----|----------|---------|----------|----------|----------|---------|---------|---------|
|    | 9.7300   | 13.8449 | 4.0000   | 37.5000  | 116.0768 | 8.5000  | 8.3122  | 2.0000  |
|    | 0.9049   | 0.4056  | 59.0626  | 3.5027   | 0.7640   | 0.0021  | 0.9745  | 0.0000  |
|    | -3.5500  | 2.9000  | 1.0493   | 4.0000   | 2.9225   | 0.0000  | 0.0000  | 0.0000  |
| Cs | 0.0100   | 1.0000  | 132.9054 | 2.6059   | 0.3922   | 0.5510  | -1.0000 | 1.0000  |
|    | 9.0000   | 2.5000  | 1.0000   | 0.0000   | 0.0000   | -3.1185 | 6.7714  | 0.0000  |
|    | -1.0000  | 0.0000  | 23.0445  | 100.0000 | 1.0000   | 0.0000  | 0.8563  | 0.0000  |
|    | -2.5000  | 3.9900  | 1.0338   | 8.0000   | 2.5791   | 1.0000  | 0.0100  | 13.0000 |
| K  | 0.0100   | 1.0000  | 39.0983  | 2.1226   | 0.1000   | 0.4000  | -1.0000 | 1.0000  |
|    | 9.0027   | 2.5000  | 1.0000   | 0.0000   | 0.0000   | -2.8800 | 7.1848  | 0.0000  |
|    | -1.0000  | 0.0000  | 23.0445  | 100.0000 | 1.0000   | 0.0000  | 0.8563  | 0.0000  |
|    | -2.5000  | 3.9900  | 1.0338   | 8.0000   | 2.5791   | 1.0000  | 0.0100  | 13.0000 |
| Na | 0.0001   | 1.0000  | 22.9898  | 2.6441   | 0.2588   | 0.8011  | -1.0000 | 1.0000  |
|    | 9.0003   | 2.5000  | 1.0000   | 0.0000   | 0.0000   | -3.4731 | 8.6438  | 0.0000  |
|    | -1.0000  | 0.0000  | 23.0445  | 100.0000 | 1.0000   | 0.0000  | 0.8563  | 0.0000  |
|    | -4.1479  | 3.9900  | 1.0338   | 8.0000   | 2.5791   | 0.0000  | 0.0000  | 0.0000  |
| Cl | 1.5046   | 1.0000  | 35.4500  | 3.0207   | 0.0568   | 0.3640  | -1.0000 | 7.0000  |
|    | 10.5008  | 10.1330 | 1.0000   | 0.0000   | 0.0000   | 10.0000 | 6.0403  | 2.0000  |
|    | -1.0000  | 0.0100  | 35.1770  | 6.2293   | 5.2294   | 0.1542  | 0.8563  | 0.0000  |
|    | -10.2080 | 2.9867  | 1.0338   | 6.2998   | 2.5791   | 0.0000  | 0.0000  | 0.0000  |
| I  | 1.9000   | 1.0000  | 126.9000 | 3.1000   | 0.1500   | 0.8298  | -1.0000 | 7.0000  |
|    | 10.5008  | 10.1330 | 1.0000   | 0.0000   | 0.0000   | 10.0000 | 6.0000  | 2.0000  |
|    | -1.0000  | 2.3407  | 35.1770  | 6.2293   | 5.2294   | 0.1542  | 0.8563  | 0.0000  |
|    | -10.2080 | 2.9867  | 1.0338   | 6.2998   | 2.5791   | 0.0000  | 0.0000  | 0.0000  |
| F  | 1.1846   | 1.0000  | 18.9984  | 1.7922   | 0.1267   | 0.4038  | -0.1000 | 7.0000  |
|    | 10.3184  | 7.5000  | 1.0000   | 9.2533   | 0.2000   | 9.3891  | 6.5612  | 2.0000  |
|    | -1.0000  | 3.5571  | 18.0000  | 6.9821   | 4.1799   | 1.0561  | 0.0000  | 0.0000  |
|    | -7.3000  | 2.6656  | 1.0493   | 4.0000   | 2.9225   | 0.0000  | 0.0000  | 0.0000  |

Li 0.0001 1.0000 6.9410 2.6000 0.0865 0.8380 -0.1000 1.0000  
9.6984 1.4649 1.0000 0.0000 0.0000 -4.0561 9.7698 0.0000  
-1.0000 0.0000 37.5000 5.4409 6.9107 0.1973 0.8563 0.0000  
-24.7916 2.2989 1.0338 1.0000 2.8103 1.3000 0.2000 13.0000  
X -0.1000 2.0000 1.0080 2.0000 0.0000 1.0000 -0.1000 6.0000  
10.0000 2.5000 4.0000 0.0000 0.0000 8.5000 1.5000 0.0000  
-0.1000 0.0000 127.6226 8.7410 13.3640 0.6690 0.9745 0.0000  
-11.0000 2.7466 1.0338 6.2998 2.8793 0.0000 0.0000 0.0000

42 ! Nr of bonds; Edis1;LPpen;n.u.;pbe1;pbo5;13corr;pbo6

pbe2;pbo3;pbo4;n.u.;pbo1;pbo2;ovcorr

1 1 158.2004 99.1897 78.0000 -0.7738 -0.4550 1.0000 37.6117 0.4147  
0.4590 -0.1000 9.1628 1.0000 -0.0777 6.7268 1.0000 0.0000  
1 2 169.4760 0.0000 0.0000 -0.6083 0.0000 1.0000 6.0000 0.7652  
5.2290 1.0000 0.0000 1.0000 -0.0500 6.9136 0.0000 0.0000  
2 2 153.3934 0.0000 0.0000 -0.4600 0.0000 1.0000 6.0000 0.7300  
6.2500 1.0000 0.0000 1.0000 -0.0790 6.0552 0.0000 0.0000  
1 3 158.6946 107.4583 23.3136 -0.4240 -0.1743 1.0000 10.8209 1.0000  
0.5322 -0.3113 7.0000 1.0000 -0.1447 5.2450 0.0000 0.0000  
3 3 142.2858 145.0000 50.8293 0.2506 -0.1000 1.0000 29.7503 0.6051  
0.3451 -0.1055 9.0000 1.0000 -0.1225 5.5000 1.0000 0.0000  
2 3 160.0000 0.0000 0.0000 -0.5725 0.0000 1.0000 6.0000 0.5626  
1.1150 1.0000 0.0000 1.0000 -0.0920 4.2790 0.0000 0.0000  
2 4 0.0000 0.0000 0.0000 -1.0000 -0.3000 1.0000 36.0000 0.7000  
10.1151 -0.3500 25.0000 1.0000 -0.1053 8.2003 1.0000 0.0000  
3 4 9.8700 0.0000 43.0000 -0.3792 -0.3000 1.0000 36.0000 0.1000  
6.7692 -0.3500 25.0000 1.0000 -0.0656 7.1227 1.0000 0.0000  
4 4 17.6609 0.0000 0.0000 0.5700 0.3000 0.0000 25.0000 0.6157

0.4946 -0.4000 12.0000 1.0000 -0.0557 4.5153 0.0000 0.0000  
 2 5 0.0000 0.0000 0.0000 -1.0000 -0.3000 1.0000 36.0000 0.7000  
 10.1151 -0.3500 25.0000 1.0000 -0.1053 8.2003 1.0000 0.0000  
 3 5 22.6146 0.0000 43.0000 0.6651 -0.3000 1.0000 36.0000 1.0000  
 0.9166 -0.3500 25.0000 1.0000 -0.0583 7.3861 1.0000 0.0000  
 5 5 22.6628 0.0000 0.0000 0.3272 0.3000 0.0000 25.0000 0.5944  
 0.9915 -0.4000 12.0000 1.0000 -0.0517 4.5075 0.0000 0.0000  
 4 5 0.0000 0.0000 0.0000 0.5000 -0.3000 1.0000 16.0000 0.5000  
 0.5000 -0.2500 15.0000 1.0000 -0.1000 9.0000 0.0000 0.0000  
 2 6 26.7569 0.0000 0.0000 1.0000 -0.3000 1.0000 36.0000 0.0100  
 0.5785 -0.3500 25.0000 1.0000 -0.2601 6.6137 1.0000 0.0000  
 3 6 27.9718 0.0000 0.0000 0.0437 -0.3000 1.0000 36.0000 0.0100  
 19.6220 -0.3500 25.0000 1.0000 -0.1279 7.3318 1.0000 0.0000  
 6 6 0.0000 0.0000 0.0000 -0.7273 0.3000 0.0000 25.0000 0.1919  
 6.6441 -0.4000 12.0000 1.0000 -0.0345 5.0063 0.0000 0.0000  
 2 7 150.6697 0.0000 0.0000 -0.6499 -0.2000 0.0000 16.0000 0.8645  
 3.8414 -0.2000 15.0000 1.0000 -0.2000 6.8063 0.0000 0.0000  
 3 7 182.6922 0.0000 0.0000 -0.0609 -0.2230 0.8849 48.3524 -0.1313  
 20.2009 -0.5687 16.1402 0.8691 -0.2518 5.8334 0.1025 0.3896  
 7 7 148.6765 0.0000 0.0000 0.7040 -0.3500 0.0000 25.0000 0.9428  
 -0.3546 -0.2500 15.0000 1.0000 -0.1329 7.0417 0.0000 0.0000  
 2 8 119.4286 0.0000 0.0000 -1.0000 -0.2000 0.0000 16.0000 0.6889  
 0.8475 -0.2000 15.0000 1.0000 -0.1744 7.4576 0.0000 0.0000  
 3 8 0.0000 0.0000 0.0000 0.5000 -0.2000 0.0000 16.0000 0.5000  
 1.0001 -0.2000 15.0000 1.0000 -0.1000 15.0000 0.0000 0.0000  
 8 8 148.6765 0.0000 0.0000 0.7040 -0.3500 0.0000 25.0000 0.9428  
 -0.3546 -0.2500 15.0000 1.0000 -0.1329 7.0417 0.0000 0.0000

2 9 154.6080 0.0000 0.0000 -0.1948 -0.2000 0.0000 16.0000 0.1676  
 16.3699 -0.2000 15.0000 1.0000 -0.2265 7.1308 0.0000 0.0000  
 3 9 0.0000 0.0000 0.0000 0.5000 -0.2000 0.0000 16.0000 0.5000  
 1.0001 -0.2000 15.0000 1.0000 -0.1000 15.0000 0.0000 0.0000  
 9 9 109.0438 0.0000 0.0000 0.6382 -0.3500 1.0000 25.0000 1.1695  
 0.1254 -0.2500 15.0000 1.0000 -0.1062 5.9666 1.0000 0.0000  
 4 9 41.1590 0.0000 0.0000 0.6401 -0.2000 0.0000 16.0000 0.4085  
 0.0992 -0.2000 15.0000 1.0000 -0.0687 5.9021 0.0000 0.0000  
 5 9 30.0000 0.0000 0.0000 0.9241 -0.2000 0.0000 16.0000 0.2072  
 0.3634 -0.2000 15.0000 1.0000 -0.0509 6.6722 0.0000 0.0000  
 4 8 26.6035 0.0000 0.0000 0.9370 -0.2000 0.0000 16.0000 0.4315  
 0.4476 -0.2000 15.0000 1.0000 -0.0647 5.7068 0.0000 0.0000  
 5 8 12.3160 0.0000 0.0000 -0.1822 -0.2000 0.0000 16.0000 0.2459  
 0.6720 -0.2000 15.0000 1.0000 -0.0500 6.3614 0.0000 0.0000  
 4 7 8.6575 0.0000 0.0000 -0.1496 -0.2000 0.0000 16.0000 0.6476  
 0.1466 -0.2000 15.0000 1.0000 -0.1292 4.7220 0.0000 0.0000  
 1 4 0.0000 0.0000 0.0000 0.5000 -0.3000 1.0000 16.0000 0.5000  
 0.5000 -0.2500 15.0000 1.0000 -0.1000 9.0000 0.0000 0.0000  
 1 5 0.0000 0.0000 0.0000 0.5000 -0.3000 1.0000 16.0000 0.5000  
 0.5000 -0.2500 15.0000 1.0000 -0.1000 9.0000 0.0000 0.0000  
 1 6 0.0000 0.0000 0.0000 0.5000 -0.3000 1.0000 16.0000 0.5000  
 0.5000 -0.2500 15.0000 1.0000 -0.1000 9.0000 0.0000 0.0000  
 1 7 0.0000 0.0000 0.0000 0.5000 -0.3000 1.0000 16.0000 0.5000  
 0.5000 -0.2500 15.0000 1.0000 -0.1000 9.0000 0.0000 0.0000  
 6 9 30.0000 0.0000 0.0000 0.9241 -0.2000 0.0000 16.0000 0.2072  
 0.3634 -0.2000 15.0000 1.0000 -0.0509 6.6722 0.0000 0.0000  
 1 9 185.5818 0.0000 0.0000 -0.6890 -0.5000 1.0000 35.0000 0.9001

4.7476 -0.2500 15.0000 1.0000 -0.1113 4.1292 1.0000 0.0000  
 5 7 28.7935 0.0000 0.0000 -0.8610 -0.2000 0.0000 16.0000 0.1362  
 6.3616 -0.2000 15.0000 1.0000 -0.0477 5.8987 0.0000 0.0000  
 6 7 9.0644 0.0000 0.0000 -0.9774 -0.3000 1.0000 16.0000 0.5363  
 1.3533 -0.2500 15.0000 1.0000 -0.0340 5.1590 0.0000 0.0000  
 2 10 0.0000 0.0000 0.0000 1.0000 -0.3000 1.0000 36.0000 0.0100  
 0.3415 -0.3500 25.0000 1.0000 -0.2770 6.4396 1.0000 0.0000  
 3 10 71.3512 -0.0200 0.0000 0.6715 0.3000 0.0000 6.0000 0.1621  
 0.1284 -0.2500 11.9965 1.0000 -0.1026 5.8179 0.0000 0.0000  
 7 10 39.6304 0.0000 0.0000 -0.6878 -0.3000 1.0000 16.0000 0.4891  
 1.8957 -0.2500 15.0000 1.0000 -0.0471 5.0000 0.0000 0.0000  
 10 10 0.0000 0.0000 0.0000 0.3228 0.3000 0.0000 26.0000 0.6003  
 1.7161 0.0000 12.0000 1.0000 -0.1015 4.0000 0.0000 0.0000

31 ! Nr of off-diagonal terms; Ediss;Ro;gamma;rsigma;rpi;rpi2

1 2 0.1239 1.4004 9.8467 1.1210 -1.0000 -1.0000  
 2 3 0.0283 1.2885 10.9190 0.9215 -1.0000 -1.0000  
 1 3 0.1156 1.8520 9.8317 1.2854 1.1352 1.0706  
 2 4 0.3000 1.6894 14.0000 -1.0000 -1.0000 -1.0000  
 3 4 0.1997 1.7894 12.7397 1.8422 -1.0000 -1.0000  
 2 5 0.3000 1.5647 13.3924 -1.0000 -1.0000 -1.0000  
 3 5 0.1832 1.7503 12.6152 1.6986 -1.0000 -1.0000  
 2 6 0.1100 1.8410 9.1430 1.7735 -1.0000 -1.0000  
 3 6 0.1536 1.6000 12.9050 1.6436 -1.0000 -1.0000  
 2 7 0.1695 1.6156 9.7834 1.4740 -1.0000 -1.0000  
 3 7 0.1164 2.2898 9.9235 -0.5309 -1.0000 -1.0000  
 2 8 0.2500 1.9082 9.7544 1.6395 -1.0000 -1.0000  
 3 8 0.0879 2.1404 10.1167 -1.0000 -1.0000 -1.0000

|    |                                                   |        |         |         |         |          |                        |
|----|---------------------------------------------------|--------|---------|---------|---------|----------|------------------------|
| 2  | 9                                                 | 0.0553 | 1.7443  | 9.0006  | 1.3514  | -1.0000  | -1.0000                |
| 3  | 9                                                 | 0.1547 | 2.1287  | 9.6188  | -1.0000 | -1.0000  | -1.0000                |
| 4  | 9                                                 | 0.2002 | 2.1104  | 11.4482 | 1.9513  | -1.0000  | -1.0000                |
| 5  | 9                                                 | 0.1775 | 1.9529  | 10.3353 | 1.6962  | -1.0000  | -1.0000                |
| 4  | 8                                                 | 0.4745 | 2.4978  | 12.1514 | 2.1186  | -1.0000  | -1.0000                |
| 5  | 8                                                 | 0.2726 | 2.3895  | 11.6451 | 2.1295  | -1.0000  | -1.0000                |
| 4  | 7                                                 | 0.2710 | 2.1676  | 12.2929 | 1.9891  | -1.0000  | -1.0000                |
| 1  | 4                                                 | 0.2000 | 1.8500  | 11.0000 | -1.0000 | -1.0000  | -1.0000                |
| 1  | 5                                                 | 0.2000 | 1.8500  | 11.0000 | -1.0000 | -1.0000  | -1.0000                |
| 1  | 6                                                 | 0.2000 | 1.8500  | 11.0000 | -1.0000 | -1.0000  | -1.0000                |
| 1  | 7                                                 | 0.2000 | 1.8500  | 11.0000 | -1.0000 | -1.0000  | -1.0000                |
| 1  | 8                                                 | 0.2000 | 1.8500  | 11.0000 | -1.0000 | -1.0000  | -1.0000                |
| 1  | 9                                                 | 0.0501 | 1.6854  | 11.0421 | 1.2644  | -1.0000  | -1.0000                |
| 6  | 7                                                 | 0.2193 | 1.8308  | 12.0561 | 1.7244  | -1.0000  | -1.0000                |
| 5  | 7                                                 | 0.2264 | 2.0209  | 12.8644 | 2.2260  | -1.0000  | -1.0000                |
| 2  | 10                                                | 0.5000 | 1.4607  | 13.0000 | -1.0000 | -1.0000  | -1.0000                |
| 3  | 10                                                | 0.0696 | 1.8520  | 10.0874 | 1.5559  | -1.0000  | 1.0000                 |
| 7  | 10                                                | 0.2331 | 1.6173  | 12.1979 | 1.7675  | -1.0000  | -1.0000                |
| 65 | ! Nr of angles;at1;at2;at3;Thetao,o;ka;kb;pv1;pv2 |        |         |         |         |          |                        |
| 1  | 1                                                 | 1      | 59.0573 | 30.7029 | 0.7606  | 0.0000   | 0.7180 6.2933 1.1244   |
| 1  | 1                                                 | 2      | 65.7758 | 14.5234 | 6.2481  | 0.0000   | 0.5665 0.0000 1.6255   |
| 2  | 1                                                 | 2      | 70.2607 | 25.2202 | 3.7312  | 0.0000   | 0.0050 0.0000 2.7500   |
| 1  | 2                                                 | 2      | 0.0000  | 0.0000  | 6.0000  | 0.0000   | 0.0000 0.0000 1.0400   |
| 1  | 2                                                 | 1      | 0.0000  | 3.4110  | 7.7350  | 0.0000   | 0.0000 0.0000 1.0400   |
| 2  | 2                                                 | 2      | 0.0000  | 27.9213 | 5.8635  | 0.0000   | 0.0000 0.0000 1.0400   |
| 1  | 1                                                 | 3      | 67.7237 | 22.2598 | 1.6663  | 0.0000   | 2.0753 0.0000 1.2458   |
| 3  | 1                                                 | 3      | 99.7513 | 33.0725 | 1.8107  | -13.5356 | 1.3482 -46.1315 1.8413 |



|   |   |   |          |         |        |         |         |         |        |
|---|---|---|----------|---------|--------|---------|---------|---------|--------|
| 2 | 1 | 3 | 65.0000  | 13.8815 | 5.0583 | 0.0000  | 0.4985  | 0.0000  | 1.4900 |
| 1 | 3 | 1 | 73.5312  | 44.7275 | 0.7354 | 0.0000  | 3.0000  | 0.0000  | 1.0684 |
| 1 | 3 | 3 | 79.4761  | 36.3701 | 1.8943 | 0.0000  | 0.7351  | 67.6777 | 3.0000 |
| 3 | 3 | 3 | 80.7324  | 30.4554 | 0.9953 | 0.0000  | 1.6310  | 50.0000 | 1.0783 |
| 1 | 3 | 2 | 70.1880  | 20.9562 | 0.3864 | 0.0000  | 0.0050  | 0.0000  | 1.6924 |
| 2 | 3 | 3 | 75.6935  | 50.0000 | 2.0000 | 0.0000  | 1.0000  | 0.0000  | 1.1680 |
| 2 | 3 | 2 | 85.8000  | 9.8453  | 2.2720 | 0.0000  | 2.8635  | 0.0000  | 1.5800 |
| 1 | 2 | 3 | 0.0000   | 25.0000 | 3.0000 | 0.0000  | 1.0000  | 0.0000  | 1.0400 |
| 3 | 2 | 3 | 0.0000   | 15.0000 | 2.8900 | 0.0000  | 0.0000  | 0.0000  | 2.8774 |
| 2 | 2 | 3 | 0.0000   | 8.5744  | 3.0000 | 0.0000  | 0.0000  | 0.0000  | 1.0421 |
| 3 | 4 | 3 | 99.7500  | 0.5445  | 8.0762 | 0.0000  | 4.0000  | 0.0000  | 1.3928 |
| 2 | 3 | 4 | 99.3112  | 3.0043  | 9.4051 | 0.0000  | 3.7889  | 0.0000  | 1.1216 |
| 4 | 3 | 4 | 97.3143  | 0.1000  | 0.2763 | 0.0000  | 3.5792  | 0.0000  | 3.9750 |
| 3 | 5 | 3 | 100.0000 | 1.2360  | 6.8249 | 0.0000  | 3.2930  | 0.0000  | 1.0000 |
| 2 | 3 | 5 | 100.0000 | 1.0007  | 9.7740 | 0.0000  | 1.4276  | 0.0000  | 1.0000 |
| 5 | 3 | 5 | 98.5744  | 2.1499  | 1.6268 | 0.0000  | 3.7347  | 0.0000  | 2.8271 |
| 3 | 2 | 7 | 0.0000   | 0.5102  | 0.0100 | 0.0000  | 0.0000  | 0.0000  | 1.3399 |
| 7 | 2 | 7 | 0.0000   | 5.0000  | 1.0000 | 0.0000  | 1.0000  | 0.0000  | 1.2500 |
| 3 | 7 | 3 | 71.0495  | 23.9532 | 5.9373 | -9.0127 | -0.2745 | -0.6384 | 2.2117 |
| 3 | 2 | 8 | 0.0000   | 1.4821  | 5.0000 | 0.0000  | 0.0000  | 0.0000  | 2.9750 |
| 3 | 2 | 9 | 0.0000   | 1.8088  | 0.0100 | 0.0000  | 0.0000  | 0.0000  | 1.2229 |
| 2 | 9 | 2 | 0.0000   | 6.9640  | 1.4314 | 0.0000  | 0.0000  | 0.0000  | 1.0400 |
| 4 | 9 | 4 | 0.0000   | 2.0000  | 1.0000 | 0.0000  | 1.0000  | 0.0000  | 1.0000 |
| 9 | 4 | 9 | 40.0000  | 1.0000  | 1.0000 | 0.0000  | 1.0000  | 0.0000  | 1.0000 |
| 4 | 9 | 9 | 0.0000   | 10.0000 | 1.0000 | 0.0000  | 1.0000  | 0.0000  | 1.4000 |
| 4 | 4 | 9 | 20.0000  | 0.0000  | 1.0000 | 0.0000  | 1.0000  | 0.0000  | 1.4000 |
| 5 | 9 | 5 | 0.0000   | 0.5000  | 1.0000 | 0.0000  | 1.0000  | 0.0000  | 1.2000 |

|   |    |    |          |         |        |        |        |        |        |
|---|----|----|----------|---------|--------|--------|--------|--------|--------|
| 9 | 5  | 9  | 40.0000  | 0.5000  | 1.0000 | 0.0000 | 1.0000 | 0.0000 | 1.2000 |
| 5 | 9  | 9  | 0.0000   | 10.0000 | 1.0000 | 0.0000 | 1.0000 | 0.0000 | 1.4000 |
| 4 | 8  | 4  | 0.0000   | 2.0000  | 1.0000 | 0.0000 | 1.0000 | 0.0000 | 1.0000 |
| 8 | 4  | 8  | 40.0000  | 1.0000  | 1.0000 | 0.0000 | 1.0000 | 0.0000 | 1.0000 |
| 4 | 8  | 8  | 0.0000   | 10.0000 | 1.0000 | 0.0000 | 1.0000 | 0.0000 | 1.4000 |
| 4 | 4  | 8  | 20.0000  | 0.0000  | 1.0000 | 0.0000 | 1.0000 | 0.0000 | 1.4000 |
| 5 | 8  | 5  | 0.0000   | 0.5000  | 1.0000 | 0.0000 | 1.0000 | 0.0000 | 1.2000 |
| 8 | 5  | 8  | 40.0000  | 0.5000  | 1.0000 | 0.0000 | 1.0000 | 0.0000 | 1.2000 |
| 5 | 8  | 8  | 0.0000   | 10.0000 | 1.0000 | 0.0000 | 1.0000 | 0.0000 | 1.4000 |
| 4 | 7  | 4  | 0.0000   | 0.5000  | 1.0000 | 0.0000 | 1.0000 | 0.0000 | 1.0000 |
| 7 | 4  | 7  | 40.0000  | 1.0000  | 1.0000 | 0.0000 | 1.0000 | 0.0000 | 1.0000 |
| 4 | 7  | 7  | 0.0000   | 10.0000 | 1.0000 | 0.0000 | 1.0000 | 0.0000 | 1.4000 |
| 4 | 4  | 7  | 20.0000  | 0.0000  | 1.0000 | 0.0000 | 1.0000 | 0.0000 | 1.4000 |
| 5 | 7  | 5  | 0.0000   | 0.5000  | 1.0000 | 0.0000 | 1.0000 | 0.0000 | 1.2000 |
| 7 | 5  | 7  | 40.0000  | 0.5000  | 1.0000 | 0.0000 | 1.0000 | 0.0000 | 1.2000 |
| 1 | 1  | 9  | 75.1647  | 40.0000 | 7.6174 | 0.0000 | 2.9750 | 0.0000 | 3.2465 |
| 9 | 1  | 9  | 76.5153  | 40.0000 | 6.1232 | 0.0000 | 3.0000 | 0.0000 | 1.0000 |
| 2 | 1  | 9  | 85.4658  | 0.0100  | 1.9807 | 0.0000 | 1.4400 | 0.0000 | 2.9068 |
| 3 | 1  | 9  | 70.0000  | 35.0000 | 2.0000 | 0.0000 | 1.0000 | 0.0000 | 1.2500 |
| 3 | 5  | 8  | 0.0000   | 3.0602  | 2.0000 | 0.0000 | 0.5000 | 0.0000 | 1.0000 |
| 3 | 4  | 9  | 0.0000   | 8.0000  | 2.0000 | 0.0000 | 0.5000 | 0.0000 | 1.0000 |
| 3 | 5  | 9  | 0.0000   | 3.7500  | 2.0000 | 0.0000 | 0.5000 | 0.0000 | 1.0000 |
| 3 | 6  | 3  | 100.0000 | 40.0000 | 7.8728 | 0.0000 | 3.2930 | 0.0000 | 2.6836 |
| 2 | 3  | 6  | 82.0800  | 5.5605  | 8.0000 | 0.0000 | 1.4276 | 0.0000 | 1.6766 |
| 6 | 3  | 6  | 81.0000  | 4.7500  | 0.9000 | 0.0000 | 1.0000 | 0.0000 | 2.0000 |
| 3 | 10 | 3  | 1.0000   | 6.7901  | 5.5000 | 0.0000 | 0.2366 | 0.0000 | 1.5936 |
| 2 | 3  | 10 | 100.0000 | 4.9629  | 8.0000 | 0.0000 | 0.1000 | 0.0000 | 1.0000 |

10 3 10 100.0000 8.0985 3.1295 0.0000 2.0000 0.0000 1.1755  
3 10 7 54.0553 22.2701 8.0000 0.0000 2.3740 0.0000 2.0553  
2 7 10 92.8098 7.7675 0.2250 0.0000 0.5870 0.0000 3.0000  
30 !Nr of torsions;at1;at2;at3;at4;;V1;V2;V3;V2(BO);vconj;n.u;n  
1 1 1 1 -0.2500 34.7453 0.0288 -6.3507 -1.6000 0.0000 0.0000  
1 1 1 2 -0.2500 29.2131 0.2945 -4.9581 -2.1802 0.0000 0.0000  
2 1 1 2 -0.2500 31.2081 0.4539 -4.8923 -2.2677 0.0000 0.0000  
1 1 1 3 -0.3495 22.2142 -0.2959 -2.5000 -1.9066 0.0000 0.0000  
2 1 1 3 0.0646 24.3195 0.6259 -3.9603 -1.0000 0.0000 0.0000  
3 1 1 3 -0.5456 5.5756 0.8433 -5.1924 -1.0180 0.0000 0.0000  
1 1 3 1 1.7555 27.9267 0.0072 -2.6533 -1.0000 0.0000 0.0000  
1 1 3 2 -1.4358 36.7830 -1.0000 -8.1821 -1.0000 0.0000 0.0000  
2 1 3 1 -1.3959 34.5053 0.7200 -2.5714 -2.1641 0.0000 0.0000  
2 1 3 2 -2.5000 70.0597 1.0000 -3.5539 -2.9929 0.0000 0.0000  
1 1 3 3 0.6852 11.2819 -0.4784 -2.5000 -2.1085 0.0000 0.0000  
2 1 3 3 0.1933 80.0000 1.0000 -4.0590 -3.0000 0.0000 0.0000  
3 1 3 1 -1.9889 76.4820 -0.1796 -3.8301 -3.0000 0.0000 0.0000  
3 1 3 2 0.2160 72.7707 -0.7087 -4.2100 -3.0000 0.0000 0.0000  
3 1 3 3 -2.5000 71.0772 0.2542 -3.1631 -3.0000 0.0000 0.0000  
1 3 3 1 2.5000 -0.6002 1.0000 -3.4297 -2.8858 0.0000 0.0000  
1 3 3 2 -2.5000 -3.3822 0.7004 -5.4467 -2.9586 0.0000 0.0000  
2 3 3 2 2.5000 -4.0000 0.9000 -2.5000 -1.0000 0.0000 0.0000  
1 3 3 3 1.2329 -4.0000 1.0000 -2.5000 -1.7479 0.0000 0.0000  
2 3 3 3 0.8302 -4.0000 -0.7763 -2.5000 -1.0000 0.0000 0.0000  
3 3 3 3 -2.5000 -4.0000 1.0000 -2.5000 -1.0000 0.0000 0.0000  
0 1 2 0 0.0000 0.0000 0.0000 0.0000 0.0000 0.0000 0.0000  
0 2 2 0 0.0000 0.0000 0.0000 0.0000 0.0000 0.0000 0.0000

|   |                                                  |    |   |         |         |         |         |         |        |        |
|---|--------------------------------------------------|----|---|---------|---------|---------|---------|---------|--------|--------|
| 0 | 2                                                | 3  | 0 | 0.0000  | 0.1000  | 0.0200  | -2.5415 | 0.0000  | 0.0000 | 0.0000 |
| 0 | 1                                                | 1  | 0 | 0.0000  | 50.0000 | 0.3000  | -4.0000 | -2.0000 | 0.0000 | 0.0000 |
| 0 | 3                                                | 3  | 0 | 0.5511  | 25.4150 | 1.1330  | -5.1903 | -1.0000 | 0.0000 | 0.0000 |
| 1 | 1                                                | 3  | 3 | -2.0000 | 73.0530 | 1.5000  | -9.0000 | -2.0000 | 0.0000 | 0.0000 |
| 1 | 3                                                | 3  | 1 | 0.0002  | 80.0000 | -1.5000 | -2.5000 | -2.0000 | 0.0000 | 0.0000 |
| 3 | 1                                                | 3  | 3 | -1.8835 | 20.0000 | 1.5000  | -9.0000 | -2.0000 | 0.0000 | 0.0000 |
| 2 | 3                                                | 10 | 3 | 0.0918  | 64.5743 | -1.0000 | -4.4228 | 0.0000  | 0.0000 | 0.0000 |
| 7 | ! Nr of hydrogen bonds;at1;at2;at3;Rhb;Dehb;vhb1 |    |   |         |         |         |         |         |        |        |
| 3 | 2                                                | 3  |   | 2.1200  | -3.5800 | 1.4500  | 19.5000 |         |        |        |
| 3 | 2                                                | 7  |   | 1.8833  | -3.6250 | 1.4500  | 19.5000 |         |        |        |
| 7 | 2                                                | 3  |   | 1.8487  | -0.0100 | 1.4500  | 19.5000 |         |        |        |
| 3 | 2                                                | 8  |   | 2.4000  | -3.9750 | 1.4500  | 19.5000 |         |        |        |
| 8 | 2                                                | 3  |   | 2.2086  | -3.9633 | 1.4500  | 19.5000 |         |        |        |
| 3 | 2                                                | 9  |   | 1.5033  | -0.0100 | 1.4500  | 19.5000 |         |        |        |
| 9 | 2                                                | 3  |   | 1.7547  | -0.2589 | 1.4500  | 19.5000 |         |        |        |
